# Supplementary material for: X chromosome-wide identification of SNVs in microRNA genes and non-obstructive azoospermia risk in Han Chinese population
Source: PubMed Central journal article supplement (PMC5226495; doi:10.18632/oncotarget.8759), 2016-04-16
Supplement: oncotarget-07-49122-s001.pdf [file oncotarget-07-49122-s001.pdf]

## X chromosome-wide identification of SNVs in microRNA genes and non-obstructive azoospermia risk in han chinese population

### SUPPLEMENTARY TABLES

**Supplementary Table S1: NOA associated SNPs in human X-linked miRNAs identified in screening stage through next generation sequencing (NGS)**

| MiRNA         | ACC       | Location in X chr. (hg19) | SNP         | Nucleotide change | Cases <sup>a</sup> | Controls <sup>a</sup> | OR              | P value |
|---------------|-----------|---------------------------|-------------|-------------------|--------------------|-----------------------|-----------------|---------|
| hsa-mir-105-2 | MI0000112 | 151562884-151562964       | rs5970293   | G > C             | 68/26              | 77/14                 | 2.10(1.26-3.52) | 0.004   |
| hsa-mir-1277  | MI0006419 | 117520357-117520434       | rs5956046   | T > C             | 47/46              | 32/57                 | 0.55(0.36-0.84) | 0.005   |
| hsa-mir-1912  | MI0008333 | 113886019-113886098       | rs12836771  | A > G             | 85/7               | 77/14                 | 0.45(0.23-0.89) | 0.020   |
| hsa-mir-325   | MI0000824 | 76225829-76225926         | rs5981521   | T > C             | 78/16              | 69/24                 | 0.59(0.36-0.97) | 0.038   |
| hsa-mir-325   | MI0000824 | 76225829-76225926         | rs5938804   | T > C             | 78/16              | 70/24                 | 0.60(0.36-0.99) | 0.044   |
| hsa-mir-325   | MI0000824 | 76225829-76225926         | rs958410    | A > G             | 74/17              | 60/25                 | 0.55(0.34-0.91) | 0.018   |
| hsa-mir-3937  | MI0016593 | 39520470-39520575         | rs5917320   | A > G             | 69/20              | 52/30                 | 0.50(0.31-0.81) | 0.004   |
| hsa-mir-4329  | MI0015901 | 112023946-112024016       | rs11152741  | G > A             | 61/32              | 79/15                 | 2.76(1.69-4.53) | 0.00004 |
| hsa-mir-4329  | MI0015901 | 112023946-112024016       | rs2286063   | G > T             | 64/30              | 79/15                 | 2.47(1.50-4.06) | 0.0003  |
| hsa-mir-4330  | MI0015902 | 150336694-150336798       | rs547043    | A > G             | 52/42              | 36/58                 | 0.50(0.33-0.76) | 0.0009  |
| hsa-mir-506   | MI0003193 | 146312238-146312361       | rs5951785   | A > G             | 77/14              | 87/10                 | 1.86(1.02-3.36) | 0.040   |
| hsa-mir-507   | MI0003194 | 146312502-146312595       | rs5905010   | C > G             | 75/18              | 84/10                 | 2.02(1.12-3.63) | 0.018   |
| hsa-mir-509-3 | MI0005717 | 146341170-146341244       | rs2504174   | C > T             | 45/49              | 35/59                 | 1.55(1.03-2.34) | 0.037   |
| hsa-mir-510   | MI0003197 | 146353853-146353926       | rs61560773  | G > C             | 85/9               | 76/17                 | 0.47(0.26-0.87) | 0.015   |
| hsa-mir-510   | MI0003197 | 146353853-146353926       | rs1447394   | G > T             | 84/10              | 73/19                 | 0.46(0.25-0.82) | 0.008   |
| hsa-mir-510   | MI0003197 | 146353853-146353926       | rs1447393   | C > G             | 83/5               | 73/13                 | 0.34(0.16-0.73) | 0.004   |
| hsa-mir-510   | MI0003197 | 146353853-146353926       | rs112589319 | T > A             | 86/8               | 75/18                 | 0.39(0.21-0.73) | 0.002   |
| hsa-mir-652   | MI0003667 | 109298557-109298654       | rs5985440   | A > G             | 89/5               | 77/17                 | 0.25(0.12-0.53) | 0.0001  |
| hsa-mir-652   | MI0003667 | 109298557-109298654       | rs12841904  | G > A             | 88/6               | 78/16                 | 0.33(0.17-0.97) | 0.001   |
| hsa-mir-766   | MI0003836 | 118780701-118780811       | rs5909648   | C > A             | 87/7               | 80/14                 | 0.46(0.23-0.90) | 0.022   |
| hsa-mir-766   | MI0003836 | 118780701-118780811       | rs6646439   | A > T             | 87/7               | 80/14                 | 0.46(0.23-0.90) | 0.022   |
| hsa-mir-767   | MI0003763 | 151561893-151562001       | rs5970291   | G > A             | 68/26              | 77/14                 | 1.73(1.06-2.83) | 0.027   |

Chr, chromosome; ACC, Accession number in miRbase; NOA, non-obstructive azoospermia; OR, odds ratio.

<sup>a</sup> Major allele/minor allele.

<sup>b</sup> OR and P values were calculated by allele model.

**Supplementary Table S2: Validation of NOA associated SNPs near human X-linked miRNAs in large population (Stage I validation)**

| MiRNA           | ACC       | Location in X chr. (hg19) | SNP         | Nucleotide change | Cases <sup>a</sup> | Controls <sup>a</sup> | OR <sup>b</sup> | P value <sup>b</sup> |
|-----------------|-----------|---------------------------|-------------|-------------------|--------------------|-----------------------|-----------------|----------------------|
| hsa-mir-105-2   | MI0000112 | 151562884-151562964       | rs5970293   | G > C             | 416/118            | 415/142               | 0.83(0.63-1.10) | 0.188                |
| hsa-mir-1277    | MI0006419 | 117520357-117520434       | rs5956046   | T > C             | 343/186            | 350/207               | 0.92(0.72-1.17) | 0.492                |
| hsa-mir-1912    | MI0008333 | 113886019-113886098       | rs12836771  | A > G             | 466/72             | 477/79                | 0.93(0.66-1.32) | 0.692                |
| hsa-mir-325     | MI0000824 | 76225829-76225926         | rs5981521   | T > C             | 463/73             | 470/90                | 0.82(0.59-1.15) | 0.255                |
| hsa-mir-325     | MI0000824 | 76225829-76225926         | rs5938804   | T > C             | 457/74             | 462/88                | 0.85(0.61-1.19) | 0.342                |
| hsa-mir-325     | MI0000824 | 76225829-76225926         | rs958410    | A > G             | 452/81             | 448/107               | 0.75(0.55-1.03) | 0.076                |
| hsa-mir-3937    | MI0016593 | 39520470-39520575         | rs5917320   | A > G             | 378/151            | 383/176               | 0.87(0.67-1.13) | 0.291                |
| hsa-mir-4329    | MI0015901 | 112023946-112024016       | rs11152741  | G > A             | 415/117            | 425/133               | 0.90(0.68-1.20) | 0.470                |
| hsa-mir-4329    | MI0015901 | 112023946-112024016       | rs2286063   | G > T             | 415/117            | 427/132               | 0.91(0.69-1.21) | 0.524                |
| hsa-mir-4330    | MI0015902 | 150336694-150336798       | rs547043    | A > G             | 225/302            | 277/272               | 1.37(1.07-1.74) | 0.011                |
| hsa-mir-506/507 | MI0003193 | 146312238-146312361       | rs5951785   | A > G             | 423/113            | 471/85                | 1.48(1.09-2.02) | 0.013                |
| hsa-mir-507     | MI0003194 | 146312502-146312595       | rs5905010   | C > G             | 434/101            | 473/85                | 1.30(0.94-1.78) | 0.109                |
| hsa-mir-509-3   | MI0005717 | 146341170-146341244       | rs2504174   | C > T             | 236/292            | 243/314               | 0.96(0.75-1.22) | 0.723                |
| hsa-mir-510     | MI0003197 | 146353853-146353926       | rs61560773  | G > C             | 469/59             | 480/80                | 0.75(0.53-1.08) | 0.125                |
| hsa-mir-510     | MI0003197 | 146353853-146353926       | rs1447394   | G > T             | 443/77             | 439/93                | 0.82(0.59-1.14) | 0.239                |
| hsa-mir-510     | MI0003197 | 146353853-146353926       | rs1447393   | C > G             | 462/47             | 469/89                | 0.54(0.37-0.78) | 0.001                |
| hsa-mir-510     | MI0003197 | 146353853-146353926       | rs112589319 | T > A             | 481/53             | 493/66                | 0.82(0.56-1.21) | 0.319                |
| hsa-mir-652     | MI0003667 | 109298557-109298654       | rs5985440   | A > G             | 463/29             | 471/54                | 0.55(0.34-0.87) | 0.012                |
| hsa-mir-652     | MI0003667 | 109298557-109298654       | rs12841904  | G > A             | 462/74             | 467/91                | 0.82(0.59-1.15) | 0.248                |
| hsa-mir-766     | MI0003836 | 118780701-118780811       | rs5909648   | C > A             | 477/57             | 489/69                | 0.85(0.58-1.23) | 0.382                |
| hsa-mir-766     | MI0003836 | 118780701-118780811       | rs6646439   | A > T             | 456/61             | 484/69                | 0.94(0.65-1.35) | 0.734                |

Chr, chromosome; ACC, Accession number in miRbase; NOA, non-obstructive azoospermia; OR, odds ratio.

<sup>a</sup> Major allele/minor allele.

<sup>b</sup> OR and P values were calculated by additive model.

**Supplementary Table S3: Validation of NOA associated SNPs near human X-linked miRNAs in large population (Stage II validation)**

| MiRNA           | ACC       | Location in X chr. (hg19) | SNP       | Nucleotide change | Cases <sup>a</sup> | Controls <sup>a</sup> | OR <sup>b</sup> | P value <sup>b</sup> |
|-----------------|-----------|---------------------------|-----------|-------------------|--------------------|-----------------------|-----------------|----------------------|
| hsa-mir-506/507 | MI0003193 | 146312238-146312361       | rs5951785 | A > G             | 386/85             | 450/60                | 1.65(1.16-2.36) | 0.006                |
| hsa-mir-510     | MI0003197 | 146353853-146353926       | rs1447393 | C > G             | 423/37             | 471/65                | 0.63(0.41-0.97) | 0.035                |
| hsa-mir-652     | MI0003667 | 109298557-109298654       | rs5985440 | A > G             | 473/35             | 495/41                | 0.89(0.56-1.43) | 0.637                |

Chr, chromosome; ACC, Accession number in miRbase; NOA, non-obstructive azoospermia; OR, odds ratio.

<sup>a</sup> Major allele/minor allele.

<sup>b</sup> OR and P values were calculated by additive model.

Supplementary Table S4: Predicted or reported targets of selected human X-miRNAs

| Selected x-linked miRNA | Predicted targets | References    | Algorithm                               |                      |         | annotation                                                                         |
|-------------------------|-------------------|---------------|-----------------------------------------|----------------------|---------|------------------------------------------------------------------------------------|
|                         |                   |               | Targetscan                              | miRanda              | miRwalk |                                                                                    |
| MiRNA-506               | <i>CDK4</i>       | PMID:24811707 |                                         |                      |         | PMID:12754735<br><i>CDK4</i> was expressed during spermatogenesis.                 |
|                         | <i>CDH2</i>       | PMID:25230372 |                                         |                      |         | PMID:25631347<br><i>CDH2</i> was associated with spermatogenesis failure.          |
|                         | <i>GLI3</i>       | PMID:24608427 |                                         |                      |         | PMID:9178901<br><i>Gli3</i> is expressed during spermatogenesis.                   |
|                         | <i>PIK3C2A</i>    |               | $P_{CT} > 0.99$<br>Context score = -0.6 | mirSVR score = -1.84 | —       | PMID:21963845<br><i>PIK3C2A</i> involved in cell proliferation.                    |
|                         | <i>STAT3</i>      | PMID:24811707 |                                         |                      |         | PMID:24560784<br><i>STAT3</i> promoted later spermatogonial differentiation steps. |
| MiRNA-507               | <i>ADAM17</i>     |               | Context score = -0.59                   | mirSVR score = -1.61 | —       | PMID: 25474107<br><i>ADAM17</i> was associated with male germ cell apoptosis.      |
|                         | <i>CAMK4</i>      |               | Context score = -0.68                   | mirSVR score = -2.06 | —       | PMID:10932193<br><i>CAMK4</i> was expressed during spermatogenesis.                |
|                         | <i>NRF2</i>       | PMID:24307696 |                                         |                      |         | PMID:23089668<br><i>NRF2</i> associated with sperm motility.                       |
| MiRNA-510               | <i>AGTPBP1</i>    |               |                                         |                      | √       |                                                                                    |
|                         | <i>SFRP2</i>      |               | Context score = -0.26                   | mirSVR score = -1.31 | —       |                                                                                    |
|                         | <i>PPP2R5E</i>    |               | Context score = -0.69                   | mirSVR score = -2.32 | —       |                                                                                    |
|                         | <i>PRDX1</i>      | PMID:23971998 |                                         |                      | —       | PMID:22640168<br><i>PRDX1</i> associated with sperm motility.                      |

Supplementary Table S5: The binding site of human X-linked miRNAs in target genes

|                |                                             |                                   |
|----------------|---------------------------------------------|-----------------------------------|
| <b>miR-506</b> | Position of 131-137 of <i>CDK4</i> 3'UTR    | 5' ... CAGAGAUUACUUUGCUGCCUAA...  |
|                | hsa-miR-506                                 | 3' AGAUGAGUCUUCCCACGGAAU          |
|                | Position of 226-232 of <i>CDH2</i> 3'UTR    | 5' ... ACUGGGAUUUUAUGUGCCUUU...   |
|                | hsa-miR-506                                 | 3' AGAUGAGUCUUCCCACGGAAU          |
|                | Position of 1206-1211 of <i>GLI3</i> 3'UTR  | 5' ... AGUAGCUGUGUGGAUGCCUUU...   |
|                | hsa-miR-506                                 | 3' AGAUGAGUCUUCCCACGGAAU          |
|                | Position of 615-621 of <i>PIK3C2A</i> 3'UTR | 5' ... AUGUUGUAAAUAUGGUGCCUUA...  |
|                | hsa-miR-506                                 | 3' AGAUGAGUCUUCCCACGGAAU          |
|                | Position of 1208-1214 of <i>STAT3</i> 3'UTR | 5' ... GUUGUUUCUGUGGGUGCCUUA...   |
|                | hsa-miR-506                                 | 3' AGAUGAGUCUUCCCACGGAAU          |
| <b>MiR-507</b> | Position of 16-22 of <i>ADAM17</i> 3'UTR    | 5' ...UUCUGACUUAAGUGUGCAAAA...    |
|                | hsa-miR-507                                 | 3' AAGUGAGGUUUUCCACGUUUU          |
|                | Position of 96-104 of <i>CAMK4</i> 3'UTR    | 5' ... UUCUGUUUUUGAGGUGCAAAA...   |
|                | hsa-miR-507                                 | 3' AAGUGAGGUUUUCCACGUUUU          |
|                | Position of 2501-2506 of <i>NRF2</i> 3'UTR  | 5' ... GUUUCUGUGUAAGUGUAAAU...    |
|                | hsa-miR-507                                 | 3' AAGUGAGGUUUUCCACGUUUU          |
| <b>MiR-510</b> | Position of 255-262 of <i>AGTPBP1</i> 3'UTR | 5' ...CCUUUAAAAAAAAAACCUGAGUA...  |
|                | hsa-miR-510                                 | 3' CACUAACGGUGAGAGGACUCAU         |
|                | Position of 161-167 of <i>SFRP2</i> 3'UTR   | 5' ...GCAUCCCCAGCAUUUCCUGAGUU...  |
|                | hsa-miR-510                                 | 3' CACUAACGGUGAGA-- GGACUCAU      |
|                | Position of 517-523 of <i>PPP2R5E</i> 3'UTR | 5' ...UCUUUUGCACAUUCUCCUGAGUU...  |
|                | hsa-miR-510                                 | 3' CACUAACGGUGAGA--- GGACUCAU     |
|                | Position of 183-189 of <i>PRDX1</i> 3'UTR   | 5' ... CUUUGGUAGGAAUGGCCUGAGUU... |
|                | hsa-miR-510                                 | 3' CACUAACGGUGAGA-GGACUCAU        |

Supplementary Table S6: The target regions of X-linked miRNAs on the customer-designed DNA capture array

(See Supplementary File 1)

Supplementary Table S7: The sequences of pre-miRNAs studied in this study.

| Pre-miRNA name | Sequences of pre-miRNAs                                                                                                               |
|----------------|---------------------------------------------------------------------------------------------------------------------------------------|
| pre-miR-506    | GCCACCACCAUCAGCCAUACUAUGUGUAGUGCCUUAUUCAGGAAGGUGUUACUU<br>AAUAGAUUAAUAAUUUGUAAGGCACCCUUCUGAGUAGAGUAAUGUGCAACAUGGA<br>CAACAUUUGUGGUGGC |
| pre-miR-507    | GUGCUGUGUGUAGUGCUUCACUUCAAGAAGUGCCAUGCAUGUGUCUAGAAAUAU<br>GUUUUGCACCUUUUGGAGUGAAAUAUGCACAACAGAUAC                                     |
| pre-miR-510    | GUGGUGUCCUACUCAGGAGAGUGGCAAUCACAUGUAAUUAGGUGUGAUUGAAA<br>CCUCUAAGAGUGGAGUAAACAC                                                       |
